# Supplementary material
Source: HighWire-hosted journal article supplement (https://rmdopen.bmj.com/content/3/2/e000550)
Supplement: inline-supplementary-material-2 [file inline-supplementary-material-2.docx]

|  |  | Patient 1 | Patient 2 | Patient 3 | Patient 4 | Patient 5 |
| --- | --- | --- | --- | --- | --- | --- |
| 2010 ACR/EULAR criteria for Rheumatoid arthritis score (total score ≥6 indicates rheumatoid arthritis | Joint involvement score | 3 | 2 | 5 | 3 | 2 |
| Serology | 3 | 3 | 3 | 3 | 2 |
| Acute phase reactants | 1 | 1 | 1 | 1 | 1 |
| Duration of symptoms | 1 | 1 | 1 | 1 | 1 |
| **Total** | **8** | **7** | **10** | **8** | **6** |
| Features suggestive  of autoinflammatory  disease process | Fever | ✓ | ✓ | ✓ | x | x |
| Serositis | ✓ | ✓ | ✓ | ✓ | x |
| Non response to traditional DMARDS | ✓ | ✓ | ✓ | ✓ | ✓ |
| Response to colchicine/Anakinra |  | ✓ | ✓ | ✓ | ✓ |
| Rare/potentially pathogenic variant in SAID genes | ✓ | ✓ | ✓ | ✓ | x |

Table 2. Principal clinical criteria used for selecting patients with overlapping autoinflammatory disease and rheumatoid arthritis features
